# Supplementary material for: A belt-like one-dimensional Dy chain exhibiting slow magnetic relaxation behavior
Source: Royal Society of Chemistry journal article supplement (doi:10.1039/c8dt03751e), 2018-01-01
Supplement: c8dt03751e1.pdf [file c8dt03751e1.pdf]

## Supporting Information

### A Belt-Like One-Dimensional Dy Chain Exhibiting Slow Magnetic Relaxation Behavior

Zhi Chen,<sup>\*a,e</sup> Yanhua Lan,<sup>b</sup> Chenliang Su,<sup>a</sup> Yi-Quan Zhang<sup>\*.c</sup> and Wolfgang Wernsdorfer<sup>b,d,e</sup>

<sup>a</sup> International Collaborative Laboratory of 2D Materials for Optoelectronics Science and Technology of Ministry of Education, College of Optoelectronic Engineering, Shenzhen University, Shenzhen 518060, China. E-mail: zhi.chen@szu.edu.cn

<sup>b</sup> Laboratoire Louis Néel–CNRS, BP 166, 25 Avenue des Martyrs, 38042 Grenoble Cedex 9, France

<sup>c</sup> Jiangsu Key Laboratory for NSLSCS, School of Physical Science and Technology, Nanjing Normal University, Nanjing 210023, China. E-mail: zhangyiquan@njnu.edu.cn

<sup>d</sup> Physikalisches Institut, Karlsruhe Institute of Technology (KIT), Wolfgang-Gaede Str. 1, D-76131, Karlsruhe, Germany

<sup>e</sup> Institut für Nanotechnologie, Karlsruhe Institute of Technology (KIT), Hermann-von-Helmholtz Platz 1, D-76344, Eggenstein-Leopoldshafen, Germany

### Computational details

Complex **1** is one-dimensional chain including three types of Dy<sup>III</sup> fragments, and thus we need to calculate three individual Dy<sup>III</sup> fragments. Complete-active-space self-consistent field (CASSCF) calculations on three individual Dy<sup>III</sup> fragments of the model structures (see Figure S1 for the calculated model structures of **1(Dy1)**, **1(Dy2)** and **1(Dy3)**) extracted from the compound on the basis of single-crystal X-ray determined geometry have been carried out with MOLCAS 8.2 program package.<sup>S1</sup> For Dy<sup>III</sup> fragments of complex **1**, the influence of the neighboring Dy<sup>III</sup> ions were taken into account by the closed-shell La<sup>III</sup> *ab initio* embedding model potentials (AIMP; La.ECP.deGraaf.0s.0s.0e-La-(LaMnO3).<sup>S2</sup>

The basis sets for all atoms are atomic natural orbitals from the MOLCAS ANO-RCC library: ANO-RCC-VTZP for Dy<sup>III</sup> ion; VTZ for close O and N; VDZ for distant atoms. The calculations employed the second order Douglas-Kroll-Hess Hamiltonian, where scalar relativistic contractions were taken into account in the basis set and the spin-orbit couplings were handled separately in the restricted active space state interaction (RASSI-SO) procedure. For individual Dy<sup>III</sup> fragments, active electrons in 7 active spaces include all *f* electrons (CAS(9 in 7)) in the CASSCF calculation. To exclude all the doubts, we calculated all the

roots in the active space. We have mixed the maximum number of spin-free state which was possible with our hardware (all from 21 sextets, 128 from 224 quadruplets, 130 from 490 doublets). Single\_Aniso<sup>S3</sup> program was used to obtain the energy levels,  $g$  tensors,  $m_j$  values, magnetic axes, *et al.*, based on the above CASSCF/RASSI calculations.

## Complementary Drawings

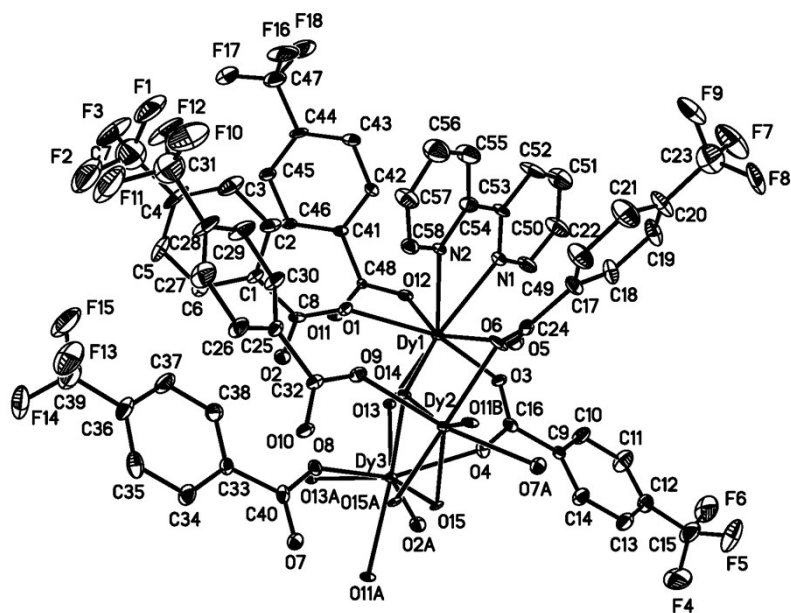

**Figure S1.** The molecular structure of compound 1.

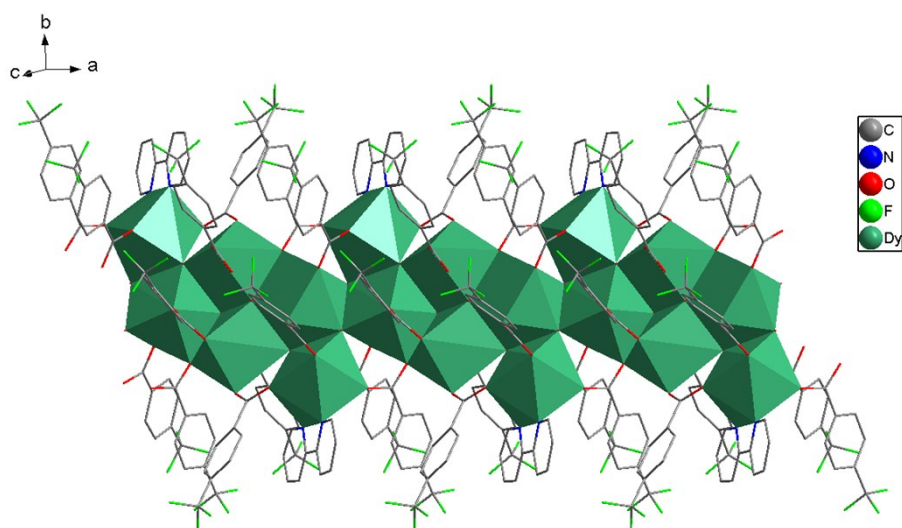

**Figure S2.** 1D structure of 1, and its coordination polyhedra of Dy(III) ions.

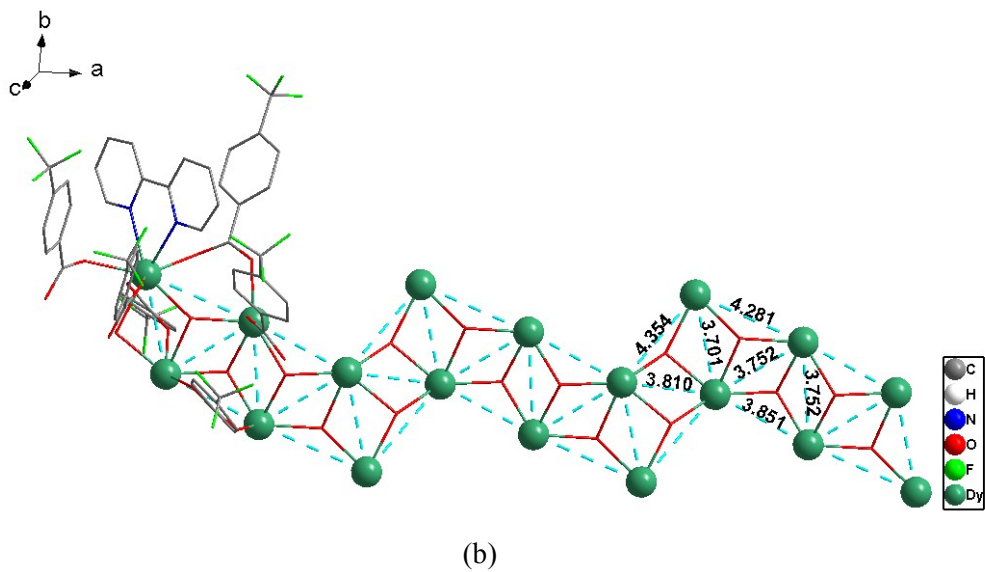

**Figure S3.** The Dy...Dy distances in 1D structure of **1**.

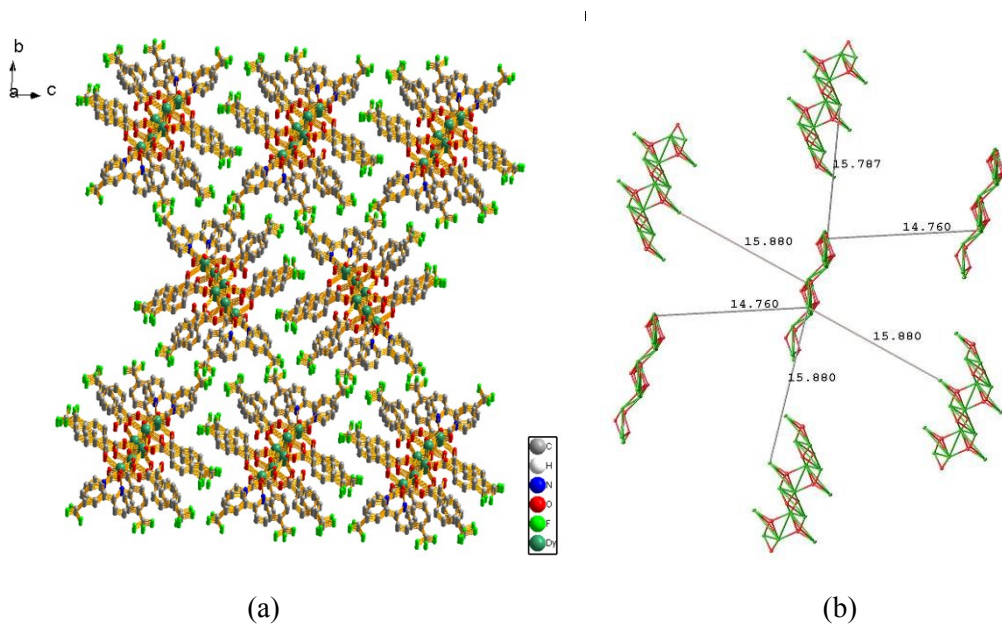

**Figure S4.** (a) 3D pack view of compound **1**. (b) the shortest distances of Dy-Dy between adjacent 1D Dy chains.

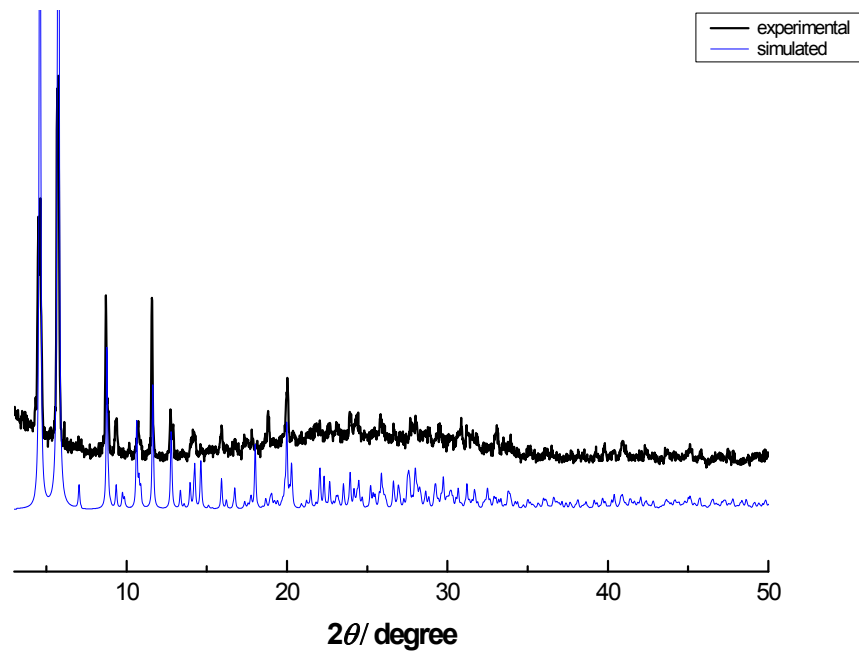

Figure S5. PXRD of compound 1.

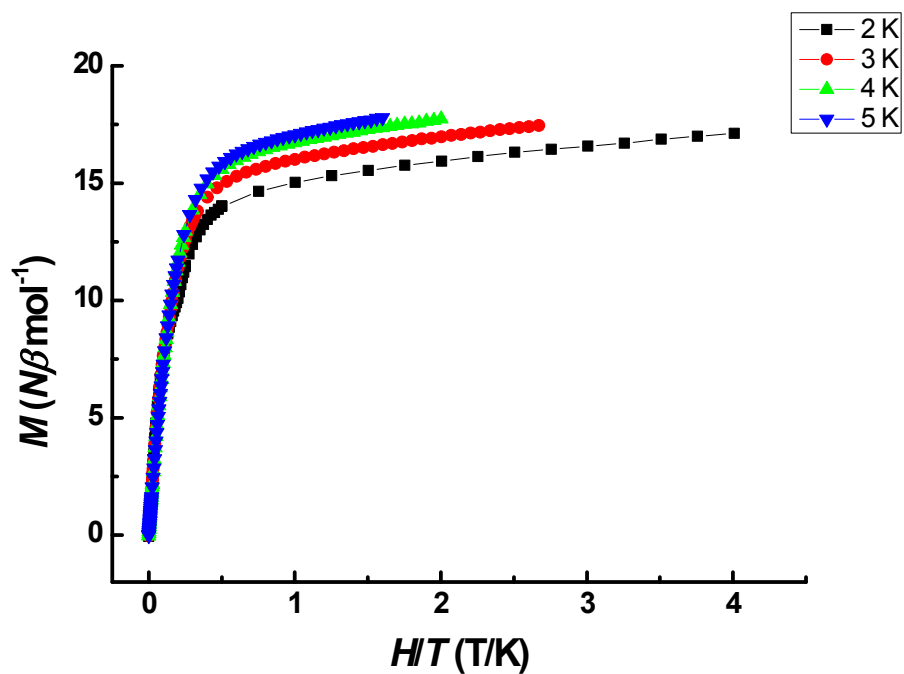

Figure S6.  $M$  versus  $H/T$  plots of 1 at 2, 3, 4 and 5 K.

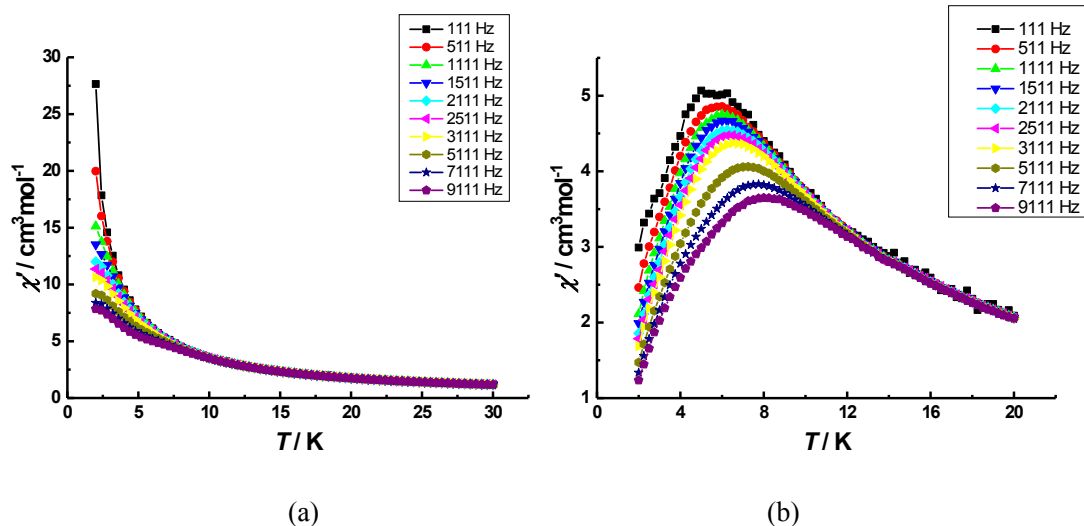

**Figure S7.** Plots of  $\chi_M'$  vs temperature for **1** at  $H_{dc} = 0$  (a) and  $H_{dc} = 5$  kOe (b) under indicated frequencies.

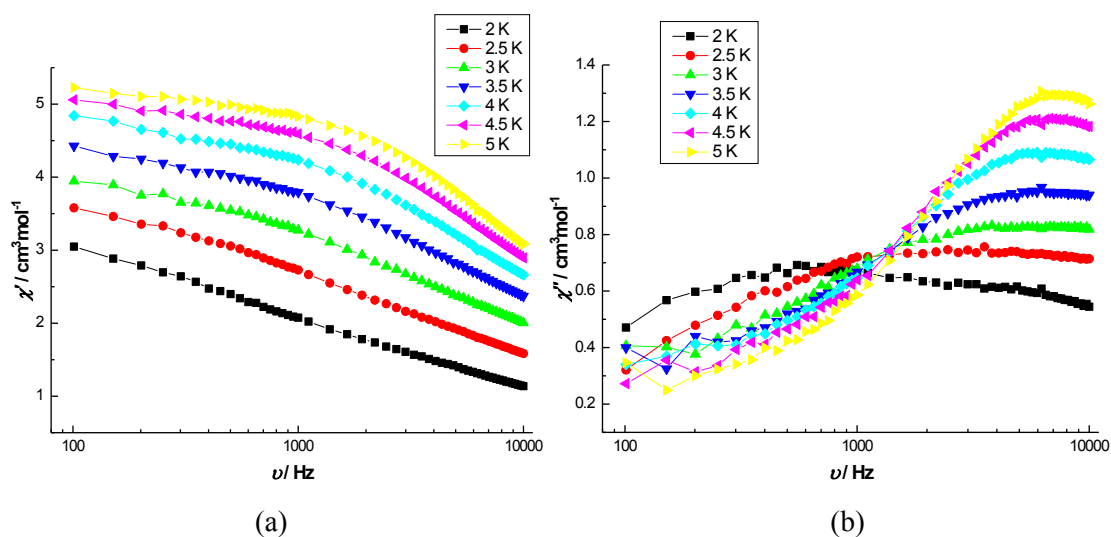

**Figure S8.** Plots of  $\chi_M'$  (a) and  $\chi_M''$  (b) vs frequencies of **1** at different temperatures.

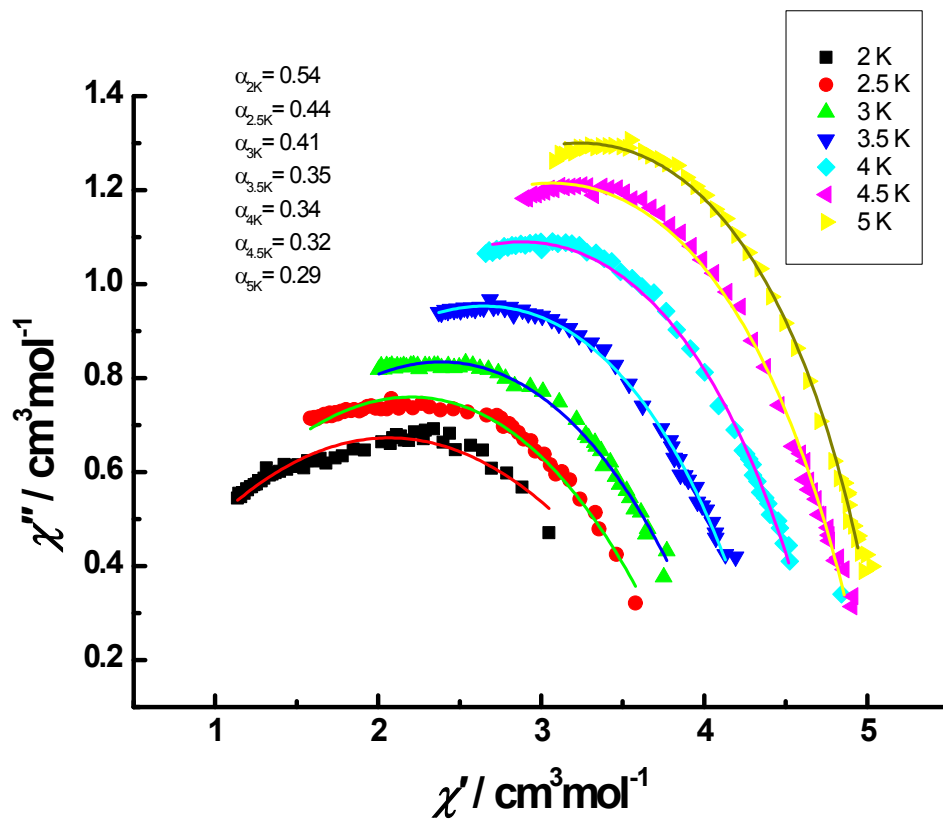

**Figure S9.** The Cole-Cole Plots of **1**. Solid lines are the least-squares fitting results.

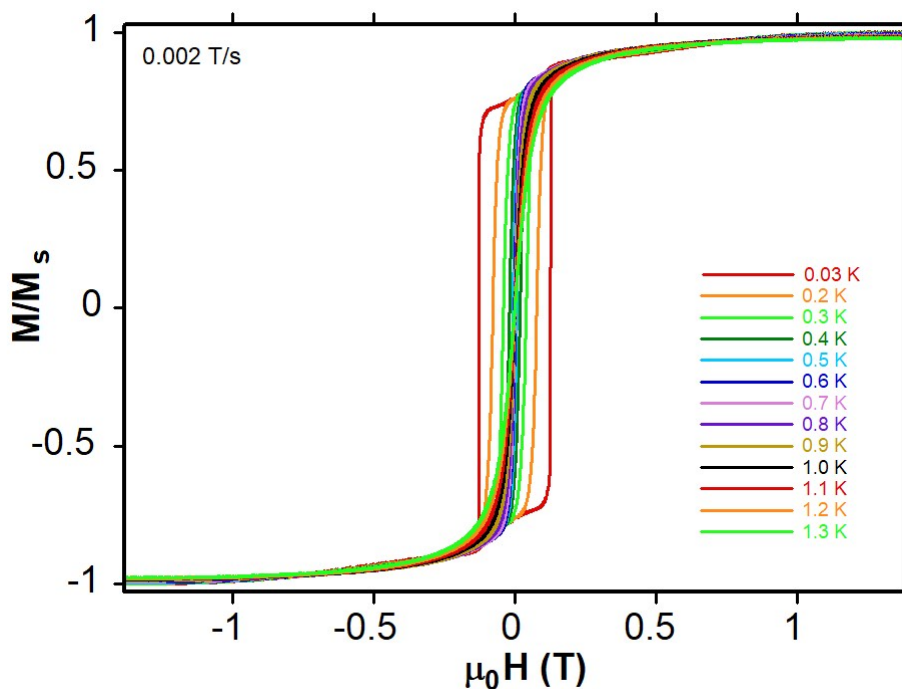

**Figure S10.** The hysteresis loops of **1** at different temperature measured by Micro-SQUID technique.

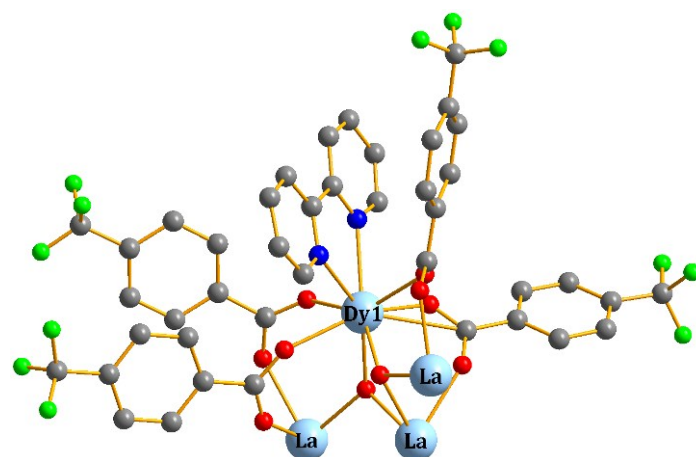

1(Dy1)

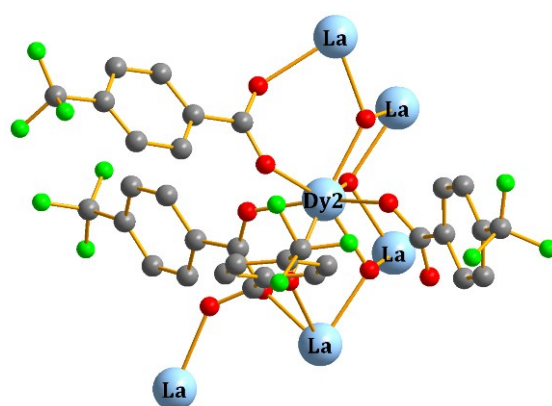

1(Dy2)

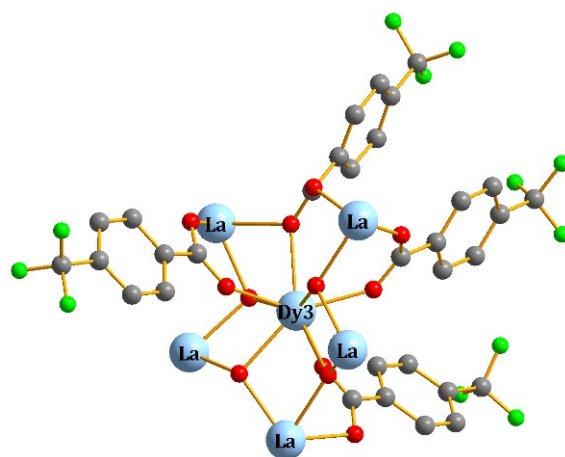

1(Dy3)

**Figure S11.** Calculated model structures of Dy<sup>III</sup> fragments of **1(Dy1)**, **1(Dy2)** and **1(Dy3)** of complex **1**; H atoms are omitted.

**Table S1.** Calculated energy levels (cm<sup>-1</sup>), **g** ( $g_x$ ,  $g_y$ ,  $g_z$ ) tensors and  $m_J$  values of the lowest

eight Kramers doublets (KDs) of individual Dy<sup>III</sup> fragments of **1(Dy1)**, **1(Dy2)** and **1(Dy3)** of complex **1** using CASSCF/RASSI with MOLCAS 8.2.

| KDs | <b>1(Dy1)</b>      |        |            | <b>1(Dy2)</b>      |        |            | <b>1(Dy3)</b>      |        |            |
|-----|--------------------|--------|------------|--------------------|--------|------------|--------------------|--------|------------|
|     | $E/\text{cm}^{-1}$ | $g$    | $m_J$      | $E/\text{cm}^{-1}$ | $g$    | $m_J$      | $E/\text{cm}^{-1}$ | $g$    | $m_J$      |
| 1   | 0.0                | 0.109  | $\pm 15/2$ | 0.0                | 0.022  | $\pm 15/2$ | 0.0                | 0.045  | $\pm 15/2$ |
|     |                    | 0.199  |            |                    | 0.038  |            |                    | 0.093  |            |
|     |                    | 19.279 |            |                    | 19.617 |            |                    | 19.239 |            |
| 2   | 86.2               | 0.709  | $\pm 13/2$ | 253.2              | 0.948  | $\pm 13/2$ | 95.6               | 0.034  | $\pm 13/2$ |
|     |                    | 1.011  |            |                    | 2.240  |            |                    | 0.089  |            |
|     |                    | 16.001 |            |                    | 15.271 |            |                    | 16.931 |            |
| 3   | 141.5              | 0.351  | $\pm 11/2$ | 360.2              | 1.127  | $\pm 3/2$  | 215.3              | 1.274  | $\pm 11/2$ |
|     |                    | 1.654  |            |                    | 3.328  |            |                    | 1.975  |            |
|     |                    | 14.331 |            |                    | 14.063 |            |                    | 13.448 |            |
| 4   | 189.9              | 3.086  | $\pm 9/2$  | 507.7              | 8.591  | $\pm 11/2$ | 310.4              | 3.116  | $\pm 7/2$  |
|     |                    | 4.690  |            |                    | 6.019  |            |                    | 3.799  |            |
|     |                    | 10.466 |            |                    | 1.173  |            |                    | 9.047  |            |
| 5   | 255.7              | 1.305  | $\pm 5/2$  | 638.1              | 2.308  | $\pm 7/2$  | 363.5              | 2.894  | $\pm 5/2$  |
|     |                    | 5.088  |            |                    | 4.940  |            |                    | 3.611  |            |
|     |                    | 10.184 |            |                    | 10.625 |            |                    | 14.148 |            |
| 6   | 307.8              | 1.748  | $\pm 1/2$  | 762.9              | 1.970  | $\pm 1/2$  | 439.6              | 0.050  | $\pm 1/2$  |
|     |                    | 3.420  |            |                    | 2.081  |            |                    | 0.126  |            |
|     |                    | 13.855 |            |                    | 13.600 |            |                    | 14.512 |            |
| 7   | 426.6              | 0.031  | $\pm 3/2$  | 853.2              | 0.180  | $\pm 5/2$  | 499.4              | 0.030  | $\pm 3/2$  |
|     |                    | 0.104  |            |                    | 0.427  |            |                    | 0.041  |            |
|     |                    | 18.352 |            |                    | 19.045 |            |                    | 18.831 |            |
| 8   | 513.0              | 0.007  | $\pm 7/2$  | 939.9              | 0.062  | $\pm 9/2$  | 729.9              | 0.000  | $\pm 9/2$  |
|     |                    | 0.016  |            |                    | 0.196  |            |                    | 0.002  |            |
|     |                    | 19.390 |            |                    | 19.153 |            |                    | 19.662 |            |

**Table S2.** Wave functions with definite projection of the total moment  $|m_J\rangle$  for the lowest two Kramers doublets (KDs) of individual Dy<sup>III</sup> fragments of **1(Dy1)**, **1(Dy2)** and **1(Dy3)** for complex **1** using CASSCF/RASSI with MOLCAS 8.2.

|               | $E/\text{cm}^{-1}$ | wave functions                                                                                             |
|---------------|--------------------|------------------------------------------------------------------------------------------------------------|
| <b>1(Dy1)</b> | 0.0                | $92\% \pm 15/2\rangle + 5\% \pm 11/2\rangle$                                                               |
|               | 86.2               | $80\% \pm 13/2\rangle + 4\% \pm 11/2\rangle + 12\% \pm 9/2\rangle$                                         |
| <b>1(Dy2)</b> | 0.0                | $98\% \pm 15/2\rangle$                                                                                     |
|               | 253.2              | $82\% \pm 13/2\rangle + 7\% \pm 7/2\rangle + 3\% \pm 5/2\rangle + 3\% \pm 3/2\rangle + 3\% \pm 1/2\rangle$ |
| <b>1(Dy3)</b> | 0.0                | $89\% \pm 15/2\rangle + 10\% \pm 11/2\rangle$                                                              |
|               | 95.6               | $70\% \pm 13/2\rangle + 11\% \pm 11/2\rangle + 15\% \pm 9/2\rangle$                                        |



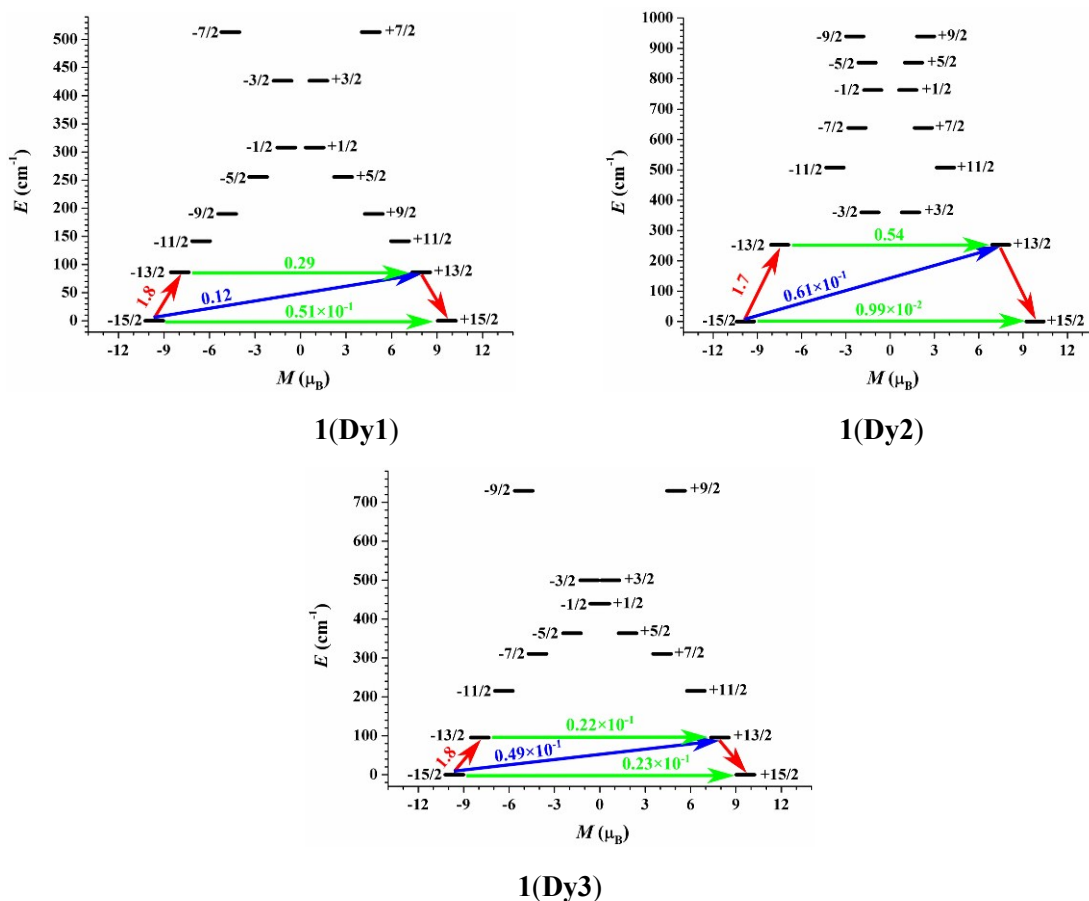

**Figure S12.** Magnetization blocking barriers for individual Dy<sup>III</sup> fragments of **1(Dy1)**, **1(Dy2)** and **1(Dy3)** in complex **1**. The thick black lines represent the Kramer doublets as a function of their magnetic moment along the magnetic axis. The green lines correspond to diagonal quantum tunneling of magnetization (QTM); the blue line represent off-diagonal relaxation process. The numbers at each arrow stand for the mean absolute value of the corresponding matrix element of transition magnetic moment.

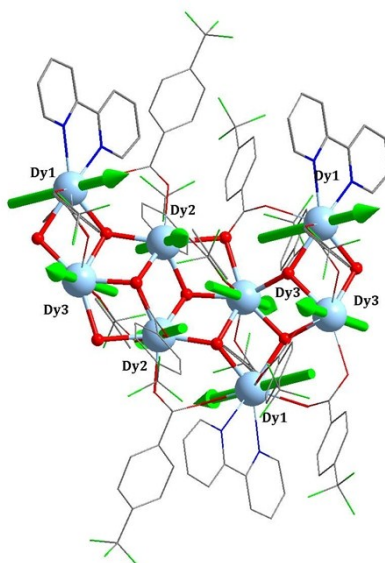

**Figure S13.** Calculated orientation of the local main magnetic axes of the ground Kramer doublet on Dy<sup>III</sup> ions of complex **1**.

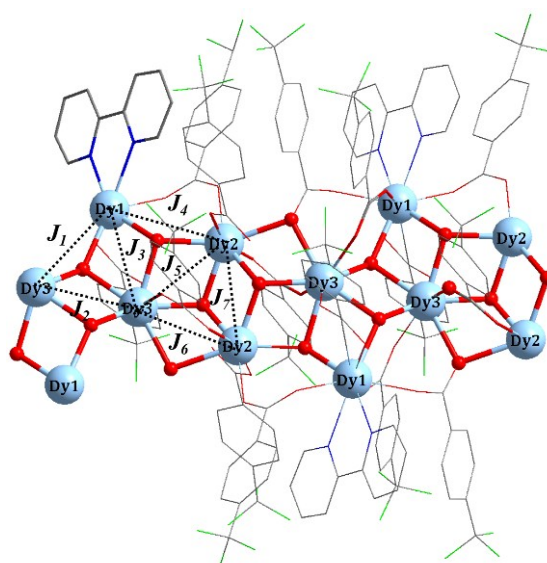

**Figure S14.** Seven types of  $J_1$ ,  $J_2$ ,  $J_3$ ,  $J_4$ ,  $J_5$ ,  $J_6$  and  $J_7$  in complex **1**.

**Table S4.** Calculated seven dipole-dipole interactions ( $J_1$ ,  $J_2$ ,  $J_3$ ,  $J_4$ ,  $J_5$ ,  $J_6$  and  $J_7$ ) between Dy<sup>III</sup> ions in complex **1** (cm<sup>-1</sup>).

|       |       |
|-------|-------|
| $J_1$ | -0.76 |
| $J_2$ | -2.90 |
| $J_3$ | -1.31 |
| $J_4$ | -1.36 |
| $J_5$ | -2.07 |
| $J_6$ | -1.68 |
| $J_7$ | -3.07 |

#### References:

- S1 (a) Aquilante, F.; De Vico, L.; Ferré, N.; Ghigo, G.; Malmqvist, P.-Å.; Neogrady, P.; Pedersen, T. B.; Pitonak, M.; Reiher, M.; Roos, B. O.; Serrano-Andrés, L.; Urban, M.; Veryazov, V.; Lindh, R. *J. Comput. Chem.*, **2010**, *31*, 224. (b) Veryazov, V.; Widmark, P.-O.; Serrano-Andrés, L.; Lindh, R.; Roos, B. O. *Int. J. Quantum Chem.*, **2004**, *100*, 626. (c) Karlström, G.; Lindh, R.; Malmqvist, P. -Å.; Roos, B. O.; Ryde, U.; Veryazov, V.; Widmark, P. -O.; Cossi, M.; Schimmelpfennig, B.; Neogrady, P.; Seijo, L. *Comput. Mater. Sci.*, **2003**, *28*, 222.
- S2 Seijo, L.; Barandiarán, Z. *Computational Chemistry: Reviews of Current Trends*; World Scientific, Inc.: Singapore, 1999; pp 455–152.
- S3 (a) Chibotaru, L. F.; Ungur, L.; Soncini, A. *Angew. Chem. Int. Ed.*, **2008**, *47*, 4126. (b) Ungur, L.; Van den Heuvel, W.; Chibotaru, L. F. *New J. Chem.*, **2009**, *33*, 1224. (c) Chibotaru, L. F.; Ungur, L.; Aronica, C.; Elmoll, H.; Pilet, G.; Luneau, D. *J. Am. Chem. Soc.*, **2008**, *130*, 12445.
